# Supplementary material
Source: PubMed Central journal article supplement (PMC5860843)
Supplement: DC170487SupplementaryData.pdf [file DC170487SupplementaryData.pdf]

SUPPLEMENTARY DATA

**Supplementary Figure 1.** SLIMM-T2D Study Patients Randomized to Roux-en-Y Gastric Bypass (RYGB) or Intensive Medical Diabetes and Weight Management (IMWM)

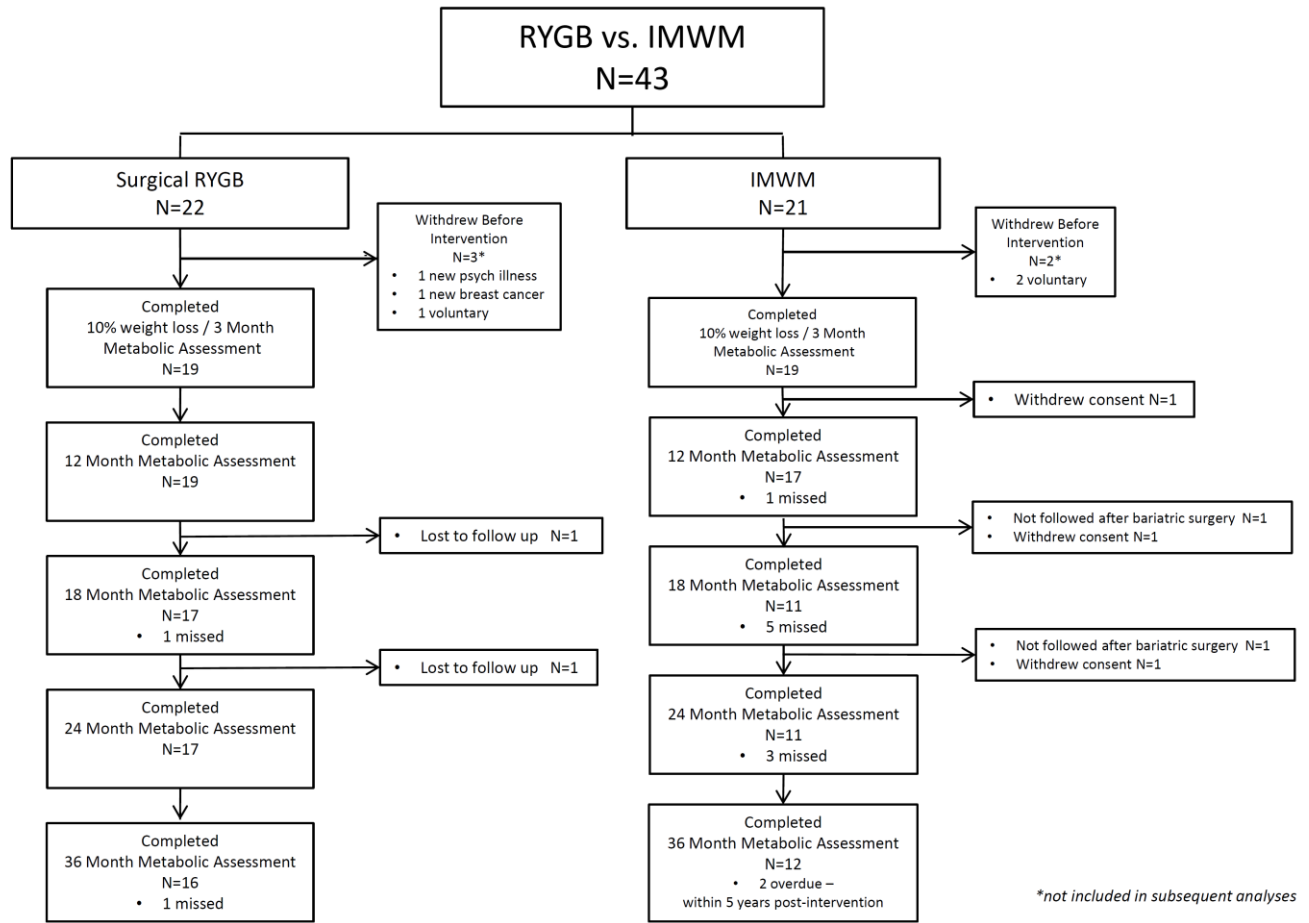

SUPPLEMENTARY DATA

**Supplementary Table 1. Serious Adverse Events**

|                                   | RYGB                                           | IMWM                                         |
|-----------------------------------|------------------------------------------------|----------------------------------------------|
|                                   | n=20 events in<br>11 participants <sub>a</sub> | n=7 events in<br>5 participants <sub>b</sub> |
| <b>Cardiac</b>                    |                                                |                                              |
| CV Death - resuscitated           |                                                | 1 <sup>c</sup>                               |
| MI                                |                                                |                                              |
| Stroke                            |                                                |                                              |
| Revascularization                 | 1                                              |                                              |
| Hospitalization for Heart Failure |                                                | 1                                            |
| Supraventricular arrhythmia       |                                                | 2                                            |
| Presyncope                        |                                                | 2                                            |
| Vascular                          | 1 <sup>d</sup>                                 |                                              |
| <b>Gastrointestinal Surgery</b>   |                                                |                                              |
| Marginal Ulcer                    | 2                                              |                                              |
| Lysis of Adhesions                | 3                                              |                                              |
| Cholestasis/Cholecystitis         | 3                                              |                                              |
| Paniclectomy                      | 2                                              |                                              |
| Orthopedic                        | 2                                              | 1                                            |
| Renal                             | 3 <sup>e</sup>                                 |                                              |
| Cancer                            | 1 <sup>f</sup>                                 |                                              |
| Psychiatric                       | 2                                              |                                              |

Food and Drug Administration (FDA) criteria of serious adverse event include death, life-threatening, hospitalization (initial or prolonged), disability or permanent damage, required intervention to prevent permanent damage, congenital anomaly/birth defect, or other important medical event that may jeopardize the patient or require medical or surgical intervention to prevent one of the other outcomes [<http://www.fda.gov/Safety/MedWatch/HowToReport/ucm053087.htm>, accessed November 18, 2016].

<sup>a</sup> One participant had five events, one participant had three events, three participants had two events each, and the remainder had a single event.

<sup>b</sup> One participant had three events and the remainder had a single event.

<sup>c</sup> Successfully resuscitated out of hospital arrest.

<sup>d</sup> Pulmonary Embolism.

<sup>e</sup> Acute Kidney Injury (1); Nephrolithiasis (1); Urinary Tract Infection (1).

<sup>f</sup> Breast cancer.
